# Supplementary material for: Family caregivers’ emotional and communication needs in Canadian pediatric emergency departments
Source: PLOS journal article supplement (doi:10.1371/journal.pone.0294597), 2023-11-22
Supplement: S1 (10.1371/journal.pone.0294597.s001) [file journal.pone.0294597.s001]

# Screening & Contact Information

Record ID \_\_\_\_\_

Note: ONLY enrolled participants should be entered into the REDCap database.

## Inclusion Criteria (should be YES to all)

|                                                                              | Yes                   | No                    |
|------------------------------------------------------------------------------|-----------------------|-----------------------|
| 1. Caregiver of child aged 0-17 years                                        | <input type="radio"/> | <input type="radio"/> |
| 2. Child presenting to 1 of 11 participating Pediatric Emergency Departments | <input type="radio"/> | <input type="radio"/> |
| 3. Ability to read and write English (or French, for Quebec and Ontario)     | <input type="radio"/> | <input type="radio"/> |

Caregiver is ineligible for the study. Inclusion criteria must all be 'Yes' for the caregiver to be eligible.

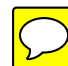

## Exclusion Criteria (should be NO to all)

|                                                                                                              | Yes                   | No                    |
|--------------------------------------------------------------------------------------------------------------|-----------------------|-----------------------|
| 1. The child remains medically unstable throughout their PED stay, as determined by the healthcare providers | <input type="radio"/> | <input type="radio"/> |
| 2. There is suspicion of child abuse, as determined by the healthcare provider                               | <input type="radio"/> | <input type="radio"/> |
| 3. The child is presenting with an altered level of consciousness                                            | <input type="radio"/> | <input type="radio"/> |
| 4. The accompanying parent is not a legal guardian of the child                                              | <input type="radio"/> | <input type="radio"/> |

Caregiver is ineligible for the study. Exclusion criteria must all be 'No' for the caregiver to be eligible.

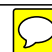

Caregiver is eligible for the study. Please proceed with consenting the caregiver.

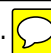

**Child Age**

Is the patient 7 years of age, or older?

☐ Yes ☐ No

Child is ineligible to complete the study survey. However, you may proceed with consenting the caregiver.

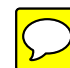

Child is eligible to complete the study survey. Please proceed with assenting the child.

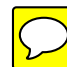**Informed Consent / Assent**

Was consent obtained from the parent / caregiver?

☐ Yes ☐ No

Was assent obtained from the child?

☐ Yes ☐ No

Family should not be enrolled in the study. Legal guardian must consent.

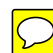**Contact Information**

Child Name

\_\_\_\_\_  
(First & Last Name)

Parent/ Caregiver Name

\_\_\_\_\_  
(First & Last Name)

Preferred Method of Follow-up:

☐ Email  
☐ Phone

Email

\_\_\_\_\_  
(Parent / Caregiver Email)

Phone Number

\_\_\_\_\_  
(Parent / Caregiver Phone Number)

Alternate Phone Number

\_\_\_\_\_

Preferred time to call

\_\_\_\_\_

# In Pediatric Emergency Department Caregiver Survey

Thank you for taking the time to complete this questionnaire. Information from the survey will be used for research purposes only and will be viewed only by members of the research team. No identifying information, including your name, will be used in any report or publication.

These questions ask about your and your child's demographics. In addition, we will ask you to look at some general health information and then answer a few questions about that information. If there are any survey questions that you would prefer not to answer, you are free to skip them.

Your responses will not affect your child's care in the emergency department.

Thank you for your participation!

## Your Child's Information

Why did you bring your child to the emergency department today?

- ☐ Child's own doctor not available
- ☐ Sent in by a doctor
- ☐ No Family doctor / Primary care doctor
- ☐ Telephone advice line said to come in
- ☐ I thought we needed Emergency Department treatment
- ☐ Other (please specify)

Please Specify:

How many times before has your child been seen in an emergency department?

- ☐ Never. This is the first time.
- ☐ 1-5
- ☐ 6-10
- ☐ >10

How many times has your child been hospitalized overnight?

- ☐ None
- ☐ 1-5
- ☐ 6-10
- ☐ >10

Do you feel that your child uses more health care than is usual for most children of their age? (e.g. asthma, diabetes, cystic fibrosis)

- ☐ Yes
- ☐ No
- ☐ Unsure

Is your child visiting today because of an ongoing health issue that has worsened?

- ☐ Yes
- ☐ No
- ☐ Unsure

## Your Information

What is your relationship to the child being seen in the emergency department today?

- ☐ Mother
- ☐ Father
- ☐ Grandfather
- ☐ Grandmother
- ☐ Other (please specify)

Please Specify:

---

What is YOUR age, in years?

---

---

How many other children do you have?

- ☐ 0
- ☐ 1
- ☐ 2
- ☐ 3
- ☐ 4
- ☐ 5
- ☐ 6
- ☐ 7
- ☐ 8
- ☐ 9
- ☐ 10

---

What is your home postal code? (1st 3 digits only)

---

---

What is the main language you speak at home?

- ☐ ☐ English
- ☐ ☐ French
- ☐ ☐ Spanish
- ☐ ☐ Mandarin Chinese
- ☐ ☐ Cantonese
- ☐ ☐ Hindi/ Urdu/ Punjabi
- ☐ ☐ Arabic
- ☐ ☐ Somali
- ☐ ☐ Portuguese
- ☐ ☐ Russian
- ☐ ☐ German
- ☐ ☐ Italian
- ☐ ☐ Dutch/Afrikaans
- ☐ ☐ Other (please specify)

---

Please Specify:

---

---

What is your highest level of Education?

- ☐ ☐ Elementary School
- ☐ ☐ High School or some High School
- ☐ ☐ Diploma/Certificate
- ☐ ☐ Some Post-Secondary/University
- ☐ ☐ University/Professional Degree
- ☐ ☐ Decline to answer

---

What is your annual household income from all sources?

- ☐ ☐ Less than or equal to \$25,000
- ☐ ☐ \$25,001 to \$50,000
- ☐ ☐ \$50,001 to \$75,000
- ☐ ☐ \$75,000 to \$100,000
- ☐ ☐ Greater than \$100,000
- ☐ ☐ Decline to answer

## Stait-Trait Anxiety Inventory

We would ask that you complete the following questions as they relate to your feelings about being in the emergency departments right now and having a child who is sick. A number of statements which people have used to describe themselves are given below. Read each statement and then circle the appropriate number to indicate how you feel right now, that is at this moment. There are no right or wrong answers. Do not spend too much time on any one statement but give the answer which seems to describe your feelings best.

|                                                      | 1 Not at all          | 2 Somewhat            | 3 Moderately so       | 4 Very much so        |
|------------------------------------------------------|-----------------------|-----------------------|-----------------------|-----------------------|
| 1. I feel calm                                       | <input type="radio"/> | <input type="radio"/> | <input type="radio"/> | <input type="radio"/> |
| 2. I feel secure                                     | <input type="radio"/> | <input type="radio"/> | <input type="radio"/> | <input type="radio"/> |
| 3. I am tense                                        | <input type="radio"/> | <input type="radio"/> | <input type="radio"/> | <input type="radio"/> |
| 4. I feel strained                                   | <input type="radio"/> | <input type="radio"/> | <input type="radio"/> | <input type="radio"/> |
| 5. I feel at ease                                    | <input type="radio"/> | <input type="radio"/> | <input type="radio"/> | <input type="radio"/> |
| 6. I feel upset                                      | <input type="radio"/> | <input type="radio"/> | <input type="radio"/> | <input type="radio"/> |
| 7. I am presently worrying over possible misfortunes | <input type="radio"/> | <input type="radio"/> | <input type="radio"/> | <input type="radio"/> |
| 8. I feel satisfied                                  | <input type="radio"/> | <input type="radio"/> | <input type="radio"/> | <input type="radio"/> |
| 9. I feel frightened                                 | <input type="radio"/> | <input type="radio"/> | <input type="radio"/> | <input type="radio"/> |
| 10. I feel comfortable                               | <input type="radio"/> | <input type="radio"/> | <input type="radio"/> | <input type="radio"/> |
| 11. I feel self-confident                            | <input type="radio"/> | <input type="radio"/> | <input type="radio"/> | <input type="radio"/> |
| 12. I feel nervous                                   | <input type="radio"/> | <input type="radio"/> | <input type="radio"/> | <input type="radio"/> |
| 13. I am jittery                                     | <input type="radio"/> | <input type="radio"/> | <input type="radio"/> | <input type="radio"/> |
| 14. I feel indecisive                                | <input type="radio"/> | <input type="radio"/> | <input type="radio"/> | <input type="radio"/> |
| 15. I am relaxed                                     | <input type="radio"/> | <input type="radio"/> | <input type="radio"/> | <input type="radio"/> |
| 16. I feel content                                   | <input type="radio"/> | <input type="radio"/> | <input type="radio"/> | <input type="radio"/> |
| 17. I am worried                                     | <input type="radio"/> | <input type="radio"/> | <input type="radio"/> | <input type="radio"/> |
| 18. I feel confused                                  | <input type="radio"/> | <input type="radio"/> | <input type="radio"/> | <input type="radio"/> |
| 19. I feel steady                                    | <input type="radio"/> | <input type="radio"/> | <input type="radio"/> | <input type="radio"/> |
| 20. I feel pleasant                                  | <input type="radio"/> | <input type="radio"/> | <input type="radio"/> | <input type="radio"/> |

As a part of this study, we are measuring something called 'Health Literacy', or a person's general understanding of health information. For this, we ask you to please answer the following questions about a Food Label.

| Nutrition Facts                                                                                                                        |                |
|----------------------------------------------------------------------------------------------------------------------------------------|----------------|
| Serving Size 1/2 cup (125 mL)                                                                                                          |                |
| Servings Per Container 4                                                                                                               |                |
| Amount Per Serving                                                                                                                     | % Daily Value* |
| <b>Calories</b> 250                                                                                                                    |                |
| <b>Fat</b> 13 g                                                                                                                        | <b>20 %</b>    |
| Saturated 9.0 g                                                                                                                        | <b>45 %</b>    |
| + Trans 0 g                                                                                                                            |                |
| <b>Cholesterol</b> 30 mg                                                                                                               |                |
| <b>Sodium</b> 55 mg                                                                                                                    | <b>2 %</b>     |
| <b>Carbohydrate</b> 30 g                                                                                                               | <b>10 %</b>    |
| Fibre 0 g                                                                                                                              | <b>0 %</b>     |
| Sugars 23 g                                                                                                                            |                |
| <b>Protein</b> 4 g                                                                                                                     |                |
| Vitamin A 10 %                                                                                                                         | Vitamin C 0 %  |
| Calcium 15 %                                                                                                                           | Iron 4 %       |
| * Percentage Daily Values are based on a 2,000 Calorie diet. Your daily values may be higher or lower depending on your Calorie needs. |                |

INGREDIENTS: Cream, skim milk, liquid sugar, water, egg yolks, brown sugar, milkfat, peanut oil, sugar, butter, salt, carrageenan, vanilla extract

If you eat the entire container, how many calories will you eat?

- ☐ 250 Calories   ☐ 300 Calories   ☐ 500 calories   ☐ 1000 Calories   ☐ I do not know

If you are allowed to eat 60 grams of carbohydrates as a snack, how much ice cream could you have?

- ☐ 1/2 cup (125 mL)   ☐ 1 cup (250 mL)   ☐ 2 cups (500 mL)   ☐ 4 cups (1000 mL)   ☐ I do not know

Your doctor advises you to reduce the amount of saturated fat in your diet. You usually have 42 g of saturated fat each day, which includes one serving of ice cream. If you stop eating ice cream, how many grams of saturated fat would you be eating each day?

- ☐ 9 grams   ☐ 15 grams   ☐ 33 grams   ☐ 42 grams   ☐ I do not know

---

If you usually eat 2,500 calories in a day, what percentage of your daily value of calories will you be eating if you eat one serving of ice cream?

☐ 5%   ☐ 10%   ☐ 20%   ☐ 250%   ☐ I do not know

---

Pretend that you are allergic to the following substances: penicillin, peanuts, latex gloves and bee stings. Is it safe for you to eat this ice cream?

☐ Yes   ☐ No   ☐ I do not know

---

Why not?

☐ Contains egg   ☐ Comes from bees   ☐ Contains peanut or peanut oil   ☐ Contains ingredients that may be harmful   ☐ I do not know

---

NVS Score

Score of 0-1 suggests high likelihood (50% or more) of limited literacy.

Score of 2-3 indicates the possibility of limited literacy.

Score of 4-6 almost always indicates adequate literacy.

---

(0-6)

# In Pediatric Emergency Department Child Survey

Assent not obtained; Do not complete survey with child.

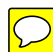

Child under the age of 7 years; Do not complete survey with child.

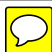

## Emotional Needs

These questions are for your emergency visit today. Please answer the following questions, where 1 means 'not at all' and goes all the way to 5, which means 'very much'.

|                                                                                                    | 1 (Not at all)        | 2                     | 3                     | 4                     | 5 (Very much)         |
|----------------------------------------------------------------------------------------------------|-----------------------|-----------------------|-----------------------|-----------------------|-----------------------|
| 1. Did you feel scared when you first walked into the hospital?                                    | <input type="radio"/> | <input type="radio"/> | <input type="radio"/> | <input type="radio"/> | <input type="radio"/> |
| 2. Did you feel scared in the waiting room?                                                        | <input type="radio"/> | <input type="radio"/> | <input type="radio"/> | <input type="radio"/> | <input type="radio"/> |
| 3. Did you feel scared when you got into your room in the emergency department?                    | <input type="radio"/> | <input type="radio"/> | <input type="radio"/> | <input type="radio"/> | <input type="radio"/> |
| 4. Right now, do you feel scared to go home?                                                       | <input type="radio"/> | <input type="radio"/> | <input type="radio"/> | <input type="radio"/> | <input type="radio"/> |
| 5. Did you feel that you had enough privacy when the doctors or nurses were talking to you?        | <input type="radio"/> | <input type="radio"/> | <input type="radio"/> | <input type="radio"/> | <input type="radio"/> |
| 6. Did you feel that you had enough privacy when the doctors or nurses were giving you a check-up? | <input type="radio"/> | <input type="radio"/> | <input type="radio"/> | <input type="radio"/> | <input type="radio"/> |

7. Did you see something scary happen to another child in the emergency department? ☐ Yes ☐ No

If yes, what happened?

\_\_\_\_\_

Did you tell anyone about how you felt? ☐ Yes ☐ No

Who did you tell?

- ☐ Mom/Dad  
☐ Nurse  
☐ Doctor  
☐ Other (please specify)

Please Specify:

\_\_\_\_\_

|                                                 | 1 (Not at all)        | 2                     | 3                     | 4                     | 5 (Very much)         |
|-------------------------------------------------|-----------------------|-----------------------|-----------------------|-----------------------|-----------------------|
| How much did they help you with feeling better? | <input type="radio"/> | <input type="radio"/> | <input type="radio"/> | <input type="radio"/> | <input type="radio"/> |

### Information Needs

- Did the nurse(s) talk directly to you? (and not just your parents) ☐ Yes ☐ No
- Did the doctor(s) talk directly to you? (and not just your parents) ☐ Yes ☐ No
- Do you understand what is wrong with you (your diagnosis)? ☐ Yes ☐ No
- Do you understand why the doctor did tests on you? ☐ Yes ☐ No ☐ I didn't have any tests
- Do you understand what will make you better? ☐ Yes ☐ No

### Emergency Operations

- Did you have to wait a long time to see a doctor? ☐ Yes, it was too long  
☐ No, it was okay
  - What would make you happier while waiting?  
\_\_\_\_\_
  - Did someone answer your questions and/or worries? ☐ Yes  
☐ No  
☐ I did not have any questions or worries
- If Yes, who answered them for you?
- ☐ Mom/Dad  
☐ Nurse  
☐ Doctor  
☐ Other (please specify)
- Please Specify:  
\_\_\_\_\_

### Practical Needs

These questions are for your emergency visit today. Please answer the following questions, where 1 means 'not at all' and goes all the way to 5, which means 'very much'.

- |                                        | 1 (Not at all)        | 2                     | 3                     | 4                     | 5 (Very much)         |
|----------------------------------------|-----------------------|-----------------------|-----------------------|-----------------------|-----------------------|
| How clean is the emergency department? | <input type="radio"/> | <input type="radio"/> | <input type="radio"/> | <input type="radio"/> | <input type="radio"/> |
| How quiet is the emergency department? | <input type="radio"/> | <input type="radio"/> | <input type="radio"/> | <input type="radio"/> | <input type="radio"/> |
- If you were allowed to eat, did someone show you where to get food and drinks in the emergency department? ☐ Yes  
☐ No  
☐ I was not allowed to eat and drink

- 
4. What other things did you need, today, to make you more comfortable in the emergency department?
- 

**Overall Care**

- |                                                       | 1 (Not at all)        | 2                     | 3                     | 4                     | 5 (Very much)         |
|-------------------------------------------------------|-----------------------|-----------------------|-----------------------|-----------------------|-----------------------|
| 1. How well did the nurse(s) take care of you today?  | <input type="radio"/> | <input type="radio"/> | <input type="radio"/> | <input type="radio"/> | <input type="radio"/> |
| 2. How well did the doctor(s) take care of you today? | <input type="radio"/> | <input type="radio"/> | <input type="radio"/> | <input type="radio"/> | <input type="radio"/> |

- 
3. Overall, did we make you happy today? ☐ Yes ☐ No
- 

4. What did we do well today?
- 

- 
5. What is the ONE most important thing you would tell us to do differently, if you came to the emergency department again?
-

# Medical Record Review (to be completed by RA)

## Child Demographics & Visit Details

Age

\_\_\_\_\_  
(years)

Sex

- ☐ Male  
☐ Female

Triage Date & Time

\_\_\_\_\_  
(dd-mm-yyyy HH:MM)

CTAS

- ☐ 1 - Resuscitation  
☐ 2 - Emergent  
☐ 3 - Urgent  
☐ 4 - Semi urgent  
☐ 5 - Non urgent

Mode of Arrival

- ☐ EMS  
☐ Private vehicle  
☐ Other

Specify other mode of arrival:

\_\_\_\_\_

Date & Time first seen by a Physician

\_\_\_\_\_  
(dd-mm-yyyy HH:MM)

Co-interventions Received

(check all that apply)

- ☐ IV insertion  
☐ Labs  
☐ X-ray  
☐ Consultation with another specialty  
☐ Oral medications  
☐ IV medications  
☐ Procedural sedation  
☐ Cast application  
☐ In-ED procedure (laceration repair, lumbar puncture)  
☐ Other (specify below)

Specify other co-interventions received in the ED:

\_\_\_\_\_

Date & Time of Discharge from the ED

\_\_\_\_\_  
(dd-mm-yyyy HH:MM)

Discharge disposition

- ☐ Discharged  
☐ Admitted  
☐ Transferred  
☐ Other (specify below)

---

Specify other discharge disposition:

---

---

Final Diagnosis

(check all that apply)

- ☐ Cardio-vascular (eg. myocarditis, cardiac syncope, congestive heart failure, arrhythmia)
  - ☐ Head and neck (eg. otitis media, mastoiditis)
  - ☐ Respiratory (eg. croup, asthma, RAD, bronchiolitis, URTI, LRTI)
  - ☐ Gastro-intestinal (eg. gastroenteritis, constipation, abdominal pain)
  - ☐ Genito-urinary (eg. UTI, STI, urinary retention)
  - ☐ Musculoskeletal (eg. fracture, sprain, strain)
  - ☐ Neurologic (eg. migraine, concussion, weakness, irritability, meningitis, vasovagal syncope, GBS)
  - ☐ Skin issues (eg. cellulitis, acne, rashes)
  - ☐ Other (please specify below)
- 

Specify other final diagnosis:

---

## Follow-up Call Log

---

Number of Follow-up Calls attempted:

- ☐ N/A completed by email  
☐ 1  
☐ 2  
☐ 3  
☐ 4  
☐ 5
- 

Date and Time of Call #1

---

---

Date and Time of Call #2

---

---

Date and Time of Call #3

---

---

Date and Time of Call #4

---

---

Date and Time of Call #5

---

## Follow-up Caregiver Survey

## Emotional Needs

The following questions pertain to your child's visit to the emergency department a few days ago.

Please describe how well the following needs were met using a 5-point scale (1= very poor/very little, up to 5= very well/very much).

- |                                                                                                                                                 | 1 (very little)       | 2                     | 3                     | 4                     | 5 (very much)         |
|-------------------------------------------------------------------------------------------------------------------------------------------------|-----------------------|-----------------------|-----------------------|-----------------------|-----------------------|
| 1. Were your emotional needs (e.g. reassurance, comforted if you were upset) met by the emergency staff during your emergency department visit? | <input type="radio"/> | <input type="radio"/> | <input type="radio"/> | <input type="radio"/> | <input type="radio"/> |

2. Which healthcare provider provided the best emotional support to you?

- ☐ Waiting room nurse  
☐ Bedside nurse  
☐ Trainee doctor (medical student/resident)  
☐ Doctor in charge/Senior doctor  
☐ Social worker  
☐ Other (please specify)  
☐ No one

Please Specify:

- |                                                          | 1 (very little)       | 2                     | 3                     | 4                     | 5 (very much)         |
|----------------------------------------------------------|-----------------------|-----------------------|-----------------------|-----------------------|-----------------------|
| 3. Did you feel that your child's privacy was respected? | <input type="radio"/> | <input type="radio"/> | <input type="radio"/> | <input type="radio"/> | <input type="radio"/> |

4. Did you see a traumatic or upsetting situation for another child while in the emergency department today? (e.g. child getting CPR, having a seizure)
- ☐ Yes   ☐ No

If yes, please describe.

- |                                                                        | 1 (very little)       | 2                     | 3                     | 4                     | 5 (very much)         |
|------------------------------------------------------------------------|-----------------------|-----------------------|-----------------------|-----------------------|-----------------------|
| 5. Did you wonder whether you should have come to the hospital sooner? | <input type="radio"/> | <input type="radio"/> | <input type="radio"/> | <input type="radio"/> | <input type="radio"/> |

- |                                                                                    | 1 (very little)       | 2                     | 3                     | 4                     | 5 (very much)         | N/A                   |
|------------------------------------------------------------------------------------|-----------------------|-----------------------|-----------------------|-----------------------|-----------------------|-----------------------|
| If so, how much did the emergency department team make you feel better about this? | <input type="radio"/> | <input type="radio"/> | <input type="radio"/> | <input type="radio"/> | <input type="radio"/> | <input type="radio"/> |

- |                                                               | 1 (very little)       | 2                     | 3                     | 4                     | 5 (very much)         |
|---------------------------------------------------------------|-----------------------|-----------------------|-----------------------|-----------------------|-----------------------|
| 6. Did you feel scared during the emergency department visit? | <input type="radio"/> | <input type="radio"/> | <input type="radio"/> | <input type="radio"/> | <input type="radio"/> |

What scared you?

|                                                                                       | 1 (very little)       | 2                     | 3                     | 4                     | 5 (very much)         | N/A                   |
|---------------------------------------------------------------------------------------|-----------------------|-----------------------|-----------------------|-----------------------|-----------------------|-----------------------|
| 7. If so, how much did the emergency department team make you feel better about this? | <input type="radio"/> | <input type="radio"/> | <input type="radio"/> | <input type="radio"/> | <input type="radio"/> | <input type="radio"/> |

8. Did you feel, at any time, that you were treated poorly/differently, based on your race, religion, sexual orientation, ability to speak English/French, a disability, or other reason? ☐ Yes ☐ No

If yes, please specify:

---

### Medical Information Needs

Please describe how well the following needs were met using a 5-point scale (1= very poor/very little, up to 5= very well/very much)

|                                                                                                                 | 1                     | 2                     | 3                     | 4                     | 5                     |                                        |
|-----------------------------------------------------------------------------------------------------------------|-----------------------|-----------------------|-----------------------|-----------------------|-----------------------|----------------------------------------|
| 1. How was the overall communication between you and your child's nurse(s)?                                     | <input type="radio"/> | <input type="radio"/> | <input type="radio"/> | <input type="radio"/> | <input type="radio"/> |                                        |
| 2. How was the overall communication between you and your child's doctor(s)?                                    | <input type="radio"/> | <input type="radio"/> | <input type="radio"/> | <input type="radio"/> | <input type="radio"/> |                                        |
| 3. Did the doctors, nurses and other providers involve your child in their own care?                            | <input type="radio"/> | <input type="radio"/> | <input type="radio"/> | <input type="radio"/> | <input type="radio"/> |                                        |
| 4. Did the doctors, nurses and other providers involve YOU in your child's care?                                | <input type="radio"/> | <input type="radio"/> | <input type="radio"/> | <input type="radio"/> | <input type="radio"/> |                                        |
| 5. How clear was the information provided to you about your child's condition?                                  | <input type="radio"/> | <input type="radio"/> | <input type="radio"/> | <input type="radio"/> | <input type="radio"/> |                                        |
|                                                                                                                 | 1                     | 2                     | 3                     | 4                     | 5                     | My child did not receive any tests     |
| 6. How clear was the information provided to you about your child's tests done in the emergency department?     | <input type="radio"/> | <input type="radio"/> | <input type="radio"/> | <input type="radio"/> | <input type="radio"/> | <input type="radio"/>                  |
|                                                                                                                 | 1                     | 2                     | 3                     | 4                     | 5                     | My child did not receive any medicines |
| 7. How clear was the information provided to you about any medicines your child received?                       | <input type="radio"/> | <input type="radio"/> | <input type="radio"/> | <input type="radio"/> | <input type="radio"/> | <input type="radio"/>                  |
|                                                                                                                 | 1                     | 2                     | 3                     | 4                     | 5                     |                                        |
| 8. How satisfactory were the updates to you about your child's care while you were in the emergency department? | <input type="radio"/> | <input type="radio"/> | <input type="radio"/> | <input type="radio"/> | <input type="radio"/> |                                        |
| 9. Did the emergency staff answer your questions and concerns?                                                  | <input type="radio"/> | <input type="radio"/> | <input type="radio"/> | <input type="radio"/> | <input type="radio"/> |                                        |
| 10. How satisfied were you with the information given to you before being discharged/admitted?                  | <input type="radio"/> | <input type="radio"/> | <input type="radio"/> | <input type="radio"/> | <input type="radio"/> |                                        |

---

My child is still  
in hospital

1

2

3

4

5

☐☐☐☐☐☐

11. How comfortable were you to care for your child's injury/illness at home, after being sent home from the hospital?

**Emergency Operations Information**

1. Do you wish you had a translator to help you communicate during your emergency visit? ☐ Yes  
☐ No

If yes, please comment:

\_\_\_\_\_

2. Did you have to wait a long time to see a doctor? ☐ Yes, it was too long  
☐ No, it was okay

3. Did you know how long you were going to have to wait? ☐ Yes  
☐ No

4. What would make wait times easier for your family, besides lowering them?

\_\_\_\_\_

- |                                                                            | 1 (not satisfied)     | 2                     | 3                     | 4                     | 5 (very satisfied)    |
|----------------------------------------------------------------------------|-----------------------|-----------------------|-----------------------|-----------------------|-----------------------|
| 5. How satisfied were you with the overall length of your emergency visit? | <input type="radio"/> | <input type="radio"/> | <input type="radio"/> | <input type="radio"/> | <input type="radio"/> |

6. If you could give any advice on how to improve the emergency department, what would you tell us?

\_\_\_\_\_

**Overall Practical Needs**

Please **RANK** each of these items as to how important you think they are during your emergency department visit (i.e. 1=most important, 4 = least important).

|                            | 1                     | 2                     | 3                     | 4                     |
|----------------------------|-----------------------|-----------------------|-----------------------|-----------------------|
| Free/low cost parking      | <input type="radio"/> | <input type="radio"/> | <input type="radio"/> | <input type="radio"/> |
| Clean emergency department | <input type="radio"/> | <input type="radio"/> | <input type="radio"/> | <input type="radio"/> |
| Safe emergency department  | <input type="radio"/> | <input type="radio"/> | <input type="radio"/> | <input type="radio"/> |
| Quiet emergency department | <input type="radio"/> | <input type="radio"/> | <input type="radio"/> | <input type="radio"/> |

**Practical Needs throughout the Visit**

Please **RANK** each of these items as to how important you think they are during your emergency department visit (i.e. 1=most important, 6 = least important).

|                                                                              | 1                     | 2                     | 3                     | 4                     | 5                     | 6                     |
|------------------------------------------------------------------------------|-----------------------|-----------------------|-----------------------|-----------------------|-----------------------|-----------------------|
| Access to phone                                                              | <input type="radio"/> | <input type="radio"/> | <input type="radio"/> | <input type="radio"/> | <input type="radio"/> | <input type="radio"/> |
| Access to electrical outlet to charge personal devices (Phones, iPads, etc.) | <input type="radio"/> | <input type="radio"/> | <input type="radio"/> | <input type="radio"/> | <input type="radio"/> | <input type="radio"/> |
| Access to power cords to charge personal devices (Phones, iPads, etc.)       | <input type="radio"/> | <input type="radio"/> | <input type="radio"/> | <input type="radio"/> | <input type="radio"/> | <input type="radio"/> |
| WiFi/internet Access                                                         | <input type="radio"/> | <input type="radio"/> | <input type="radio"/> | <input type="radio"/> | <input type="radio"/> | <input type="radio"/> |
| Access to free food                                                          | <input type="radio"/> | <input type="radio"/> | <input type="radio"/> | <input type="radio"/> | <input type="radio"/> | <input type="radio"/> |
| Access to free drinks                                                        | <input type="radio"/> | <input type="radio"/> | <input type="radio"/> | <input type="radio"/> | <input type="radio"/> | <input type="radio"/> |

**Practical Needs in the Waiting Room**

Please RANK each of these items as to how important you think they are during your emergency department visit (i.e. 1=most important, 4 = least important).

|                                                                     | 1                     | 2                     | 3                     | 4                     |
|---------------------------------------------------------------------|-----------------------|-----------------------|-----------------------|-----------------------|
| Breastfeeding space in the waiting room                             | <input type="radio"/> | <input type="radio"/> | <input type="radio"/> | <input type="radio"/> |
| Age appropriate toys/games/books for your child in the waiting room | <input type="radio"/> | <input type="radio"/> | <input type="radio"/> | <input type="radio"/> |
| Video Games/TV Screens in the waiting room                          | <input type="radio"/> | <input type="radio"/> | <input type="radio"/> | <input type="radio"/> |
| Space for your family in the waiting room                           | <input type="radio"/> | <input type="radio"/> | <input type="radio"/> | <input type="radio"/> |

**Practical Needs in the Patient Room**

Please **RANK** each of these items as to how important you think they are during your emergency department visit (i.e. 1=most important, 6 = least important).

|                                                                         | 1                     | 2                     | 3                     | 4                     | 5                     | 6                     |
|-------------------------------------------------------------------------|-----------------------|-----------------------|-----------------------|-----------------------|-----------------------|-----------------------|
| Toiletries/Wash Kit                                                     | <input type="radio"/> | <input type="radio"/> | <input type="radio"/> | <input type="radio"/> | <input type="radio"/> | <input type="radio"/> |
| Availability of diapers                                                 | <input type="radio"/> | <input type="radio"/> | <input type="radio"/> | <input type="radio"/> | <input type="radio"/> | <input type="radio"/> |
| Dim lighting for resting/sleeping child                                 | <input type="radio"/> | <input type="radio"/> | <input type="radio"/> | <input type="radio"/> | <input type="radio"/> | <input type="radio"/> |
| Age appropriate toys/games/books for your child when in the patient bed | <input type="radio"/> | <input type="radio"/> | <input type="radio"/> | <input type="radio"/> | <input type="radio"/> | <input type="radio"/> |
| Video Games/TV Screens in the patient room                              | <input type="radio"/> | <input type="radio"/> | <input type="radio"/> | <input type="radio"/> | <input type="radio"/> | <input type="radio"/> |
| Size of patient room                                                    | <input type="radio"/> | <input type="radio"/> | <input type="radio"/> | <input type="radio"/> | <input type="radio"/> | <input type="radio"/> |

## Overall Care and Future Directions

Please describe how well we met your needs today, using a 5-point scale (1= very poor/not satisfied, up to 5= very well/very satisfied)

|                                                                                                                                          | 1                                                                                                                                                                                                                                                                                                                                 | 2                     | 3                     | 4                     | 5                     |
|------------------------------------------------------------------------------------------------------------------------------------------|-----------------------------------------------------------------------------------------------------------------------------------------------------------------------------------------------------------------------------------------------------------------------------------------------------------------------------------|-----------------------|-----------------------|-----------------------|-----------------------|
| 1. Overall, to what extent did we meet your child's needs?                                                                               | <input type="radio"/>                                                                                                                                                                                                                                                                                                             | <input type="radio"/> | <input type="radio"/> | <input type="radio"/> | <input type="radio"/> |
| 2. Overall, to what extent did we meet your needs?                                                                                       | <input type="radio"/>                                                                                                                                                                                                                                                                                                             | <input type="radio"/> | <input type="radio"/> | <input type="radio"/> | <input type="radio"/> |
| 3. Was your child's pain well managed?                                                                                                   | <input type="radio"/>                                                                                                                                                                                                                                                                                                             | <input type="radio"/> | <input type="radio"/> | <input type="radio"/> | <input type="radio"/> |
| 4. What could have been done differently to manage it better?                                                                            | <hr/>                                                                                                                                                                                                                                                                                                                             |                       |                       |                       |                       |
| 5. Which need was best met during your child's visit?                                                                                    | <hr/>                                                                                                                                                                                                                                                                                                                             |                       |                       |                       |                       |
| 6. Which need was most poorly met during your child's visit?                                                                             | <hr/>                                                                                                                                                                                                                                                                                                                             |                       |                       |                       |                       |
| 7. Overall, what are the most important things to improve in the emergency department?<br>(Choose all that apply)                        | <input type="checkbox"/> Better use of technology<br><input type="checkbox"/> Better pain management<br><input type="checkbox"/> Faster diagnosis<br><input type="checkbox"/> Better communication of wait times and any delays<br><input type="checkbox"/> Shorter wait times<br><input type="checkbox"/> Other (please specify) |                       |                       |                       |                       |
| Please Specify:                                                                                                                          | <hr/>                                                                                                                                                                                                                                                                                                                             |                       |                       |                       |                       |
| 8. Is there any information about the emergency department that you wished you'd have known before arriving at the emergency department? | <hr/>                                                                                                                                                                                                                                                                                                                             |                       |                       |                       |                       |
| 9. How do you like to receive written discharge information?                                                                             | <input type="radio"/> Paper handout<br><input type="radio"/> Email<br><input type="radio"/> Text<br><input type="radio"/> Website<br><input type="radio"/> Other (please specify)                                                                                                                                                 |                       |                       |                       |                       |
| Please Specify:                                                                                                                          | <hr/>                                                                                                                                                                                                                                                                                                                             |                       |                       |                       |                       |

**Thoughts on Emergency Research**

1. Are you interested in helping us to improve the health care system by participating in further research?

☐ Yes  
☐ No

If so, which of these options would you prefer?

- ☐ ☐ I want to hear about all the studies and decide for myself which studies I want my child to participate in  
☐ ☐ I would like to be approached on an individual basis only if the study applies to my child's condition

2. When research is done in the emergency department, what is the best time to ask your family to participate?

- ☐ ☐ Waiting room  
☐ ☐ After being seen by a doctor  
☐ ☐ Right before you can leave  
☐ ☐ Other (please specify)

Please Specify:

\_\_\_\_\_

3. What is the best way to encourage families to participate in research?

\_\_\_\_\_

# Early Withdrawal Form

Date & Time of Withdrawal

\_\_\_\_\_

Reason for Withdrawal  
(select all that apply)

- ☐ Withdrawal of consent / assent  
☐ Other, specify

Other, specify

\_\_\_\_\_

## If withdrew consent/ assent:

|                                                                 | Yes                   | No                    |
|-----------------------------------------------------------------|-----------------------|-----------------------|
| 1. <input type="checkbox"/> Permission to use collected data?   | <input type="radio"/> | <input type="radio"/> |
| 2. <input type="checkbox"/> Permission to conduct Chart Review? | <input type="radio"/> | <input type="radio"/> |
| 3. <input type="checkbox"/> Follow-up to continue?              | <input type="radio"/> | <input type="radio"/> |
